# Supplementary material
Source: publisher site journal article supplement (https://www.kjim.org/upload/media/kjim-2024-314-supplementary-fig-2.pdf)
Supplement: Supplementary file 1 [file kjim-2024-314-supplementary-fig-2.pdf]

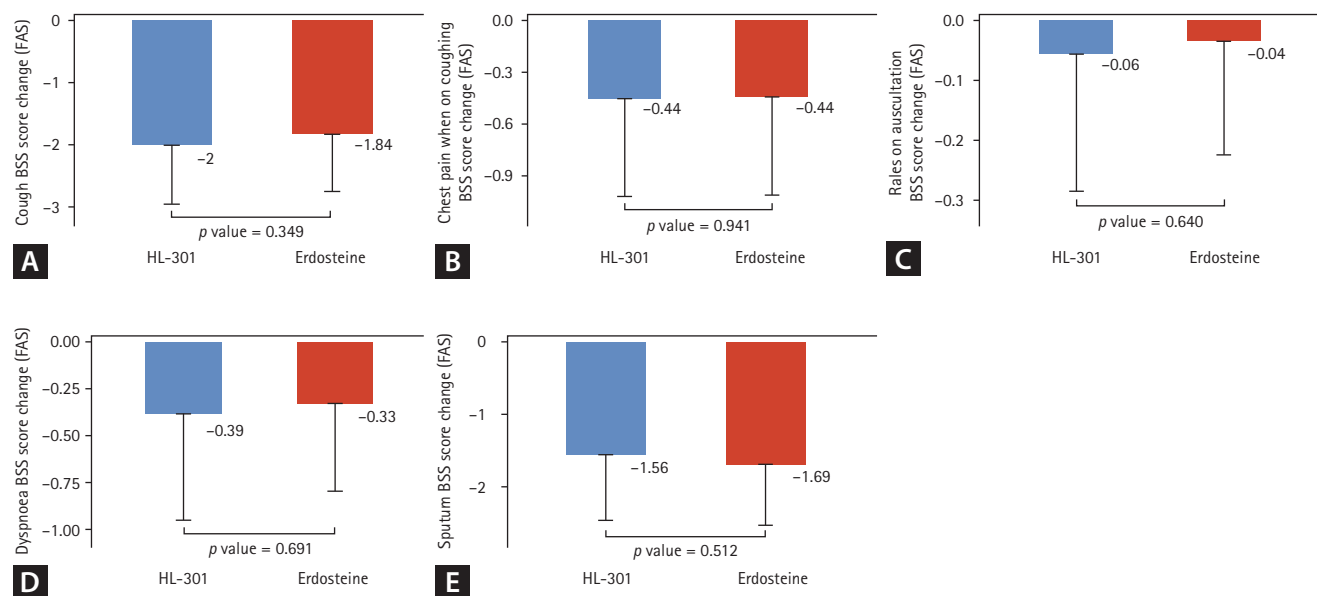

**Supplementary Figure 2.** Change in BSS by symptom (FAS): (A) Cough and BSS change, (B) Chest pain on coughing and BSS change, (C) Rales on auscultation and BSS change, (D) Dyspnea and BSS change, (E) Sputum and BSS change. BSS, Bronchitis Severity Score; FAS, full analysis set.
